# Supplementary material for: TBK1 Promote Bladder Cancer Cell Proliferation and Migration via Akt Signaling
Source: PubMed Central journal article supplement — J Cancer. 2017 Jul 3;8(10):1892–9. doi: 10.7150/jca.17638 (PMC5556653; doi:10.7150/jca.17638), 2017-07-03
Supplement: jcav08p1892s1.pdf [file jcav08p1892s1.pdf]

## Supplementary figures

**FigS1. TBK1 is up-regulated in bladder tumor tissue.**

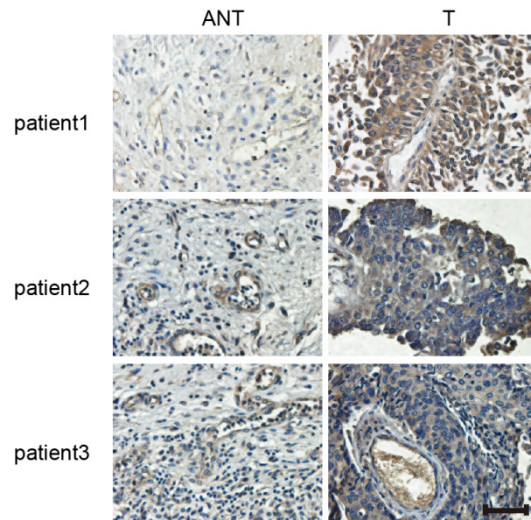

IHC analysis of TBK1 expression in bladder tumor specimens (T) compared with paired adjacent non-tumour tissue (ANT). Scale bar represent 20μm.
